# Supplementary material for: Lysosomal protease deficiency or substrate overload induces an oxidative-stress mediated STAT3-dependent pathway of lysosomal homeostasis
Source: PubMed Central journal article supplement (PMC6297226; doi:10.1038/s41467-018-07741-6), 2018-12-17
Supplement: 41467_2018_7741_MOESM2_ESM.pdf [file 41467_2018_7741_MOESM2_ESM.pdf]

**Editorial Note:** this manuscript has been previously reviewed at another journal that is not operating a transparent peer review scheme. This document only contains reviewer comments and rebuttal letters for versions considered at Nature Communications.

**Reviewers' Comments:**

**Reviewer #1 (Remarks to the Author):**

In my opinion, the authors have addressed Reviewer 1's concerns satisfactorily. This is a very nice piece of work that puts forward a novel concept (role of STAT3 in lysosomal adaptation) and is supported by excellent data and multiple independent lines of evidence.
